# Supplementary material
Source: publisher figshare collection journal article supplement (https://acs.figshare.com/ndownloader/files/5186371)
Supplement: Supplementary file 1 [file 5186371]

## Supporting Information: In Vitro Effects of a C4'-Oxidized Abasic Site on DNA Polymerases

Marc M. Greenberg<sup>\*1</sup>, Yvonne N. Weledji<sup>1</sup>, Kelly M. Kroeger<sup>1</sup>, Jaeseung Kim<sup>1</sup>, and Myron F. Goodman<sup>2</sup>

<sup>1</sup>Department of Chemistry, Johns Hopkins University, 3400 N. Charles St., Baltimore, MD 21218;

<sup>2</sup>Department of Biological Sciences, Molecular Biology Section, University of Southern California, Los Angeles, CA 90089

### Contents:

1. Supporting Information Figure 1. Klenow  $\text{exo}^+$  (10 nM) mediated extension of **3a,b** (75 nM) in the presence of native dNTP's (0.1 mM each). A) **3a** B) **3b**.
2. Supporting Information Figure 2. Klenow  $\text{exo}^-$  (1, 5, 10 nM) mediated extension of **3a** (75 nM) in the presence of native dNTP's (0.1 mM each). Reaction time: 1 h.
3. Supporting Information Figure 3. Bypass polymerase extension of **3a-c** by pol II (100, 200, 500 nM), pol II  $\text{exo}^-$  (100, 200, 500 nM), and pol IV (100, 200, 500 nM). A) **3a**, **3b** (2 nM) B) **3c** (2 nM).
4. Supporting Information Figure 4. Pol V (250 nM), Rec A (250 nM) extension of **3a-c** (10 nM).

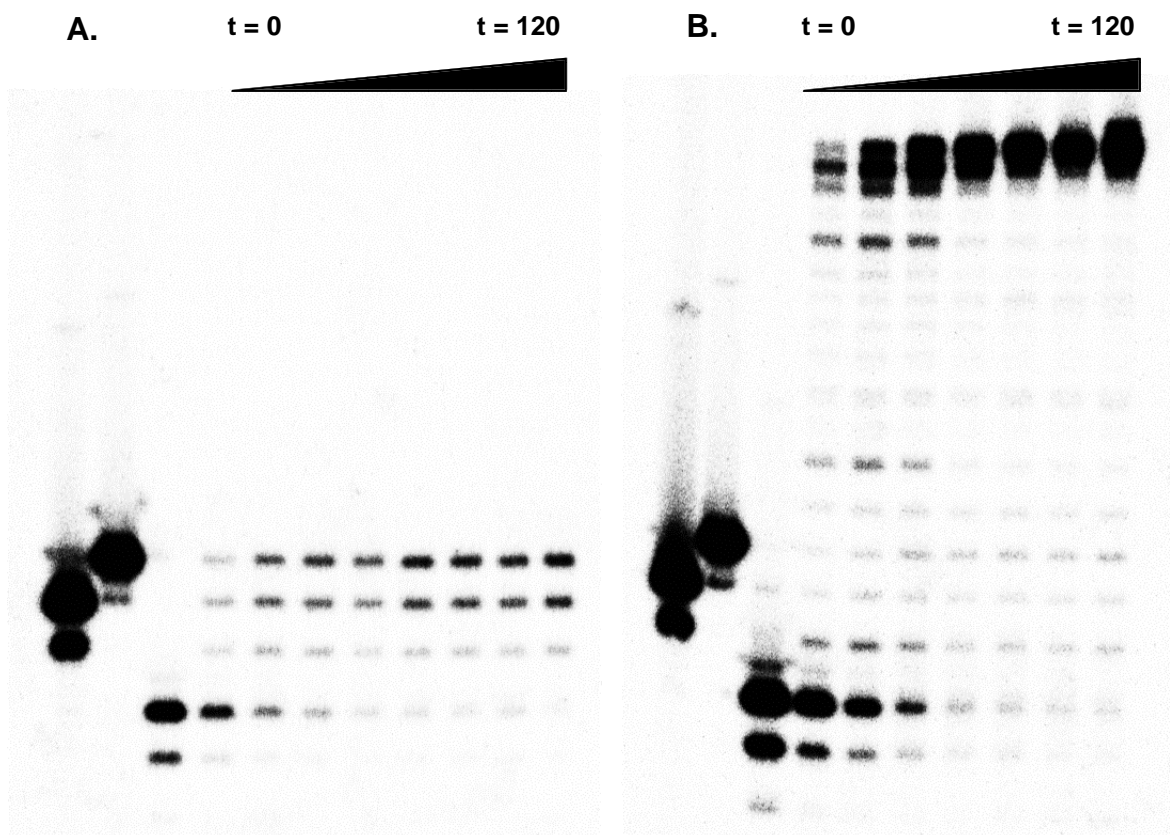

**Supporting Information Figure 1.** Klenow  $\text{exo}^+$  (10 nM) mediated extension of **3a,b** (75 nM) in the presence of native dNTP's (0.1 mM each). A) **3a** B) **3b**.

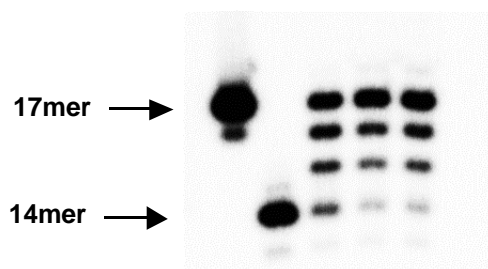

**Supporting Information Figure 2.** Klenow  $\text{exo}^-$  (1, 5, 10 nM) mediated extension of **3a** (75 nM) in the presence of native dNTP's (0.1 mM each).  $t = 1$  h.

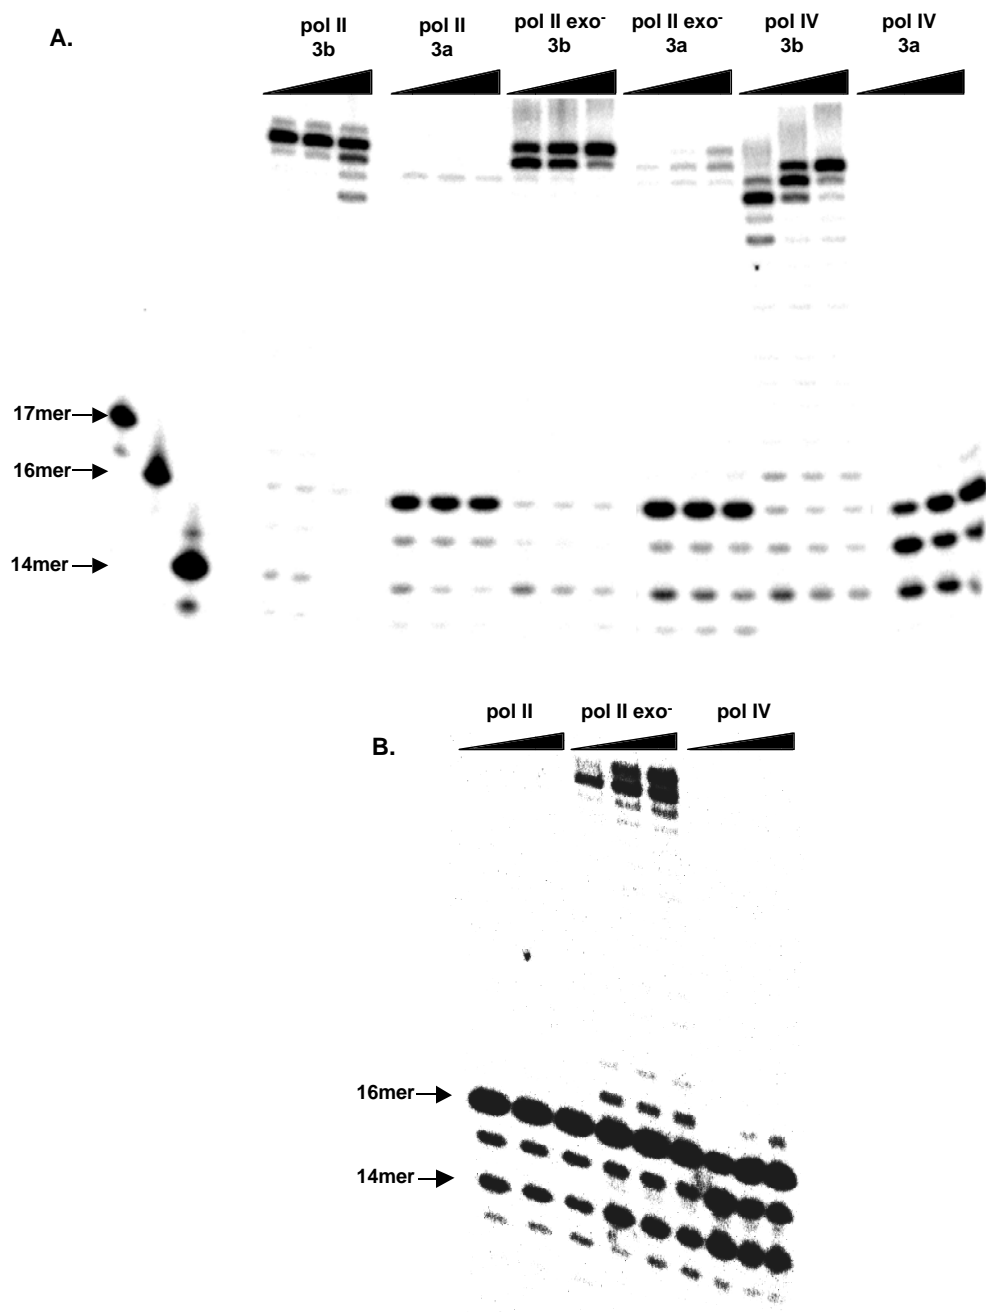

**Supporting Information Figure 3.** Bypass polymerase extension of **3a-c** by pol II (100, 200, 500 nM), pol II exo<sup>-</sup> (100, 200, 500 nM), and pol IV (100, 200, 500 nM). A) **3a, 3b** (2 nM) B) **3c** (2 nM).

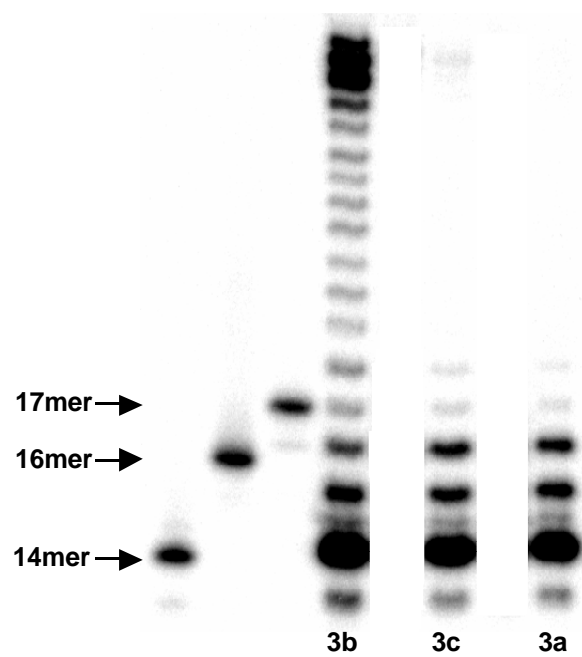

**Supporting Information Figure 4.** Pol V (250 nM), Rec A (250 nM) extension of **3a-c** (10 nM).
